# Supplementary material for: In virio SHAPE analysis of tRNALys3 annealing to HIV-1 genomic RNA in wild type and protease-deficient virus
Source: PubMed Central journal article supplement (PMC4445796; doi:10.1186/s12977-015-0171-7), 2015-05-16
Supplement: 12977_2015_171_MOESM1_ESM.pdf [file 12977_2015_171_MOESM1_ESM.pdf]

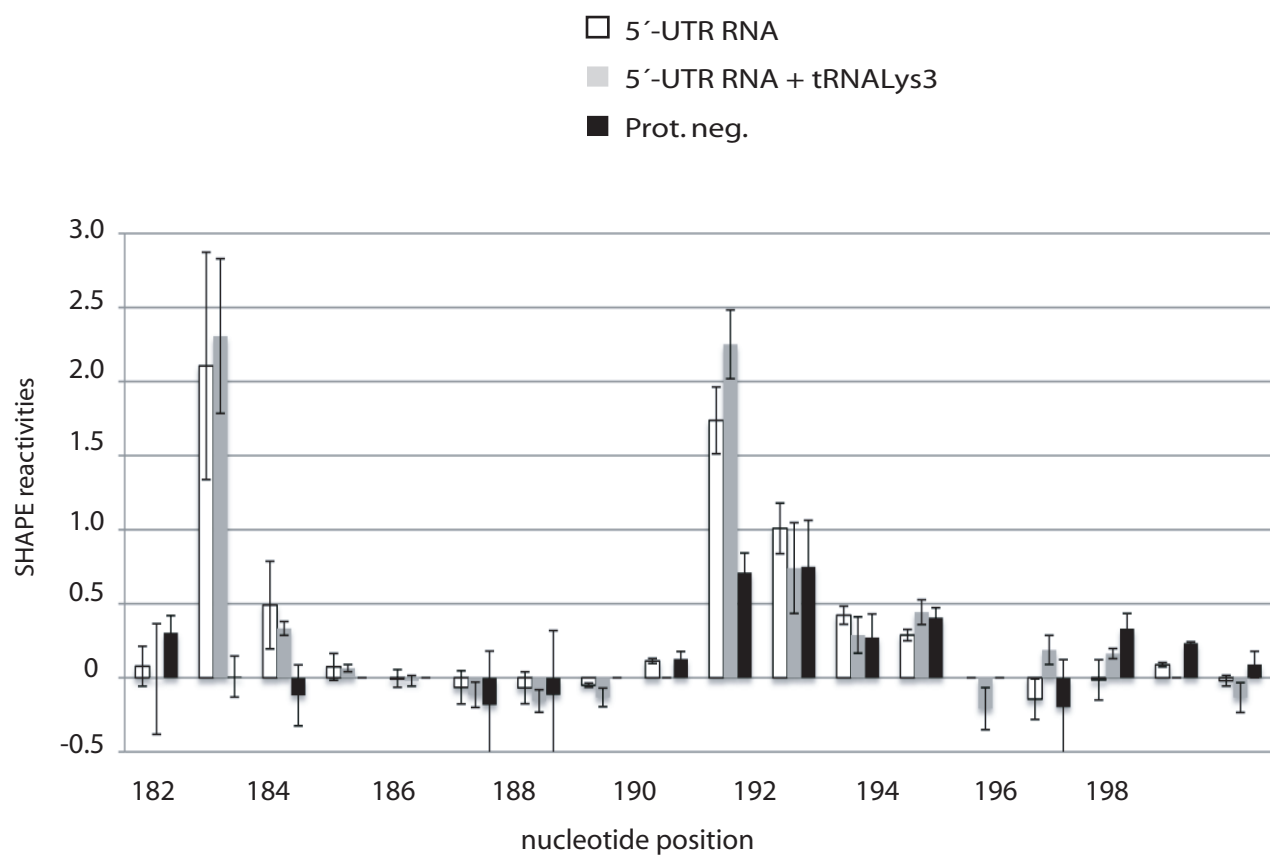

Additional-file-1
